# Supplementary material for: Steroid Androgen Exposure during Development Has No Effect on Reproductive Physiology of Biomphalaria glabrata
Source: PubMed Central journal article supplement (PMC4957768; doi:10.1371/journal.pone.0159852), 2016-07-22
Supplement: pone.0159852.s010.pdf [file pone.0159852.s010.pdf]

Table A

Descriptives per tank MT experiment

|                     |        | N   | Mean  | Std. Deviation | Std. Error | 95% Confidence Interval for Mean |             | Minimum | Maximum | Levene's P= | t-test for Equality of Means |                 |                       | 95% Confidence Interval of the |       |
|---------------------|--------|-----|-------|----------------|------------|----------------------------------|-------------|---------|---------|-------------|------------------------------|-----------------|-----------------------|--------------------------------|-------|
|                     |        |     |       |                |            | Lower Bound                      | Upper Bound |         |         |             | Sig. (2-tailed) P=           | Mean Difference | Std. Error Difference | Lower                          | Upper |
| shell diameter (mm) | DWC-1  | 19  | 11.52 | 0.98           | 0.22       | 11.05                            | 11.99       | 8.79    | 13.43   | 0.44        | 0.001*                       | 1.28            | 0.35                  | 0.57                           | 2.00  |
|                     | DWC-2  | 20  | 10.23 | 1.20           | 0.27       | 9.67                             | 10.79       | 7.62    | 12.79   |             |                              |                 |                       |                                |       |
|                     | SC-1   | 17  | 11.55 | 2.37           | 0.58       | 10.33                            | 12.77       | 5.67    | 15.03   | 0.759       | <0.001*                      | 3.96            | 0.75                  | 2.44                           | 5.48  |
|                     | SC-2   | 21  | 7.59  | 2.24           | 0.49       | 6.57                             | 8.61        | 3.57    | 10.61   |             |                              |                 |                       |                                |       |
|                     | 62.5-1 | 16  | 9.69  | 2.46           | 0.61       | 8.38                             | 11.00       | 4.97    | 14.07   | 0.163       | 0.149                        | 1.18            | 0.79                  | -0.45                          | 2.81  |
|                     | 62.5-2 | 14  | 8.51  | 1.78           | 0.48       | 7.48                             | 9.54        | 5.46    | 11.49   |             |                              |                 |                       |                                |       |
|                     | 125-1  | 19  | 10.90 | 1.83           | 0.42       | 10.02                            | 11.78       | 6.67    | 13.48   | 0.314       | <0.001*                      | 2.49            | 0.58                  | 1.30                           | 3.68  |
|                     | 125-2  | 14  | 8.41  | 1.39           | 0.37       | 7.60                             | 9.21        | 5.30    | 11.19   |             |                              |                 |                       |                                |       |
|                     | 250-1  | 8   | 5.79  | 0.98           | 0.34       | 4.97                             | 6.60        | 4.17    | 6.93    | 0.128       | 0.001                        | -2.62           | 0.66                  | -3.98                          | -1.27 |
|                     | 250-2  | 17  | 8.41  | 1.71           | 0.42       | 7.53                             | 9.29        | 4.51    | 10.97   |             |                              |                 |                       |                                |       |
|                     | 500-1  | 18  | 8.32  | 2.76           | 0.65       | 6.95                             | 9.70        | 2.97    | 12.43   | 0.315       | 0.105                        | -1.70           | 1.01                  | -3.77                          | 0.38  |
|                     | 500-2  | 10  | 10.02 | 2.14           | 0.68       | 8.49                             | 11.55       | 6.55    | 13.51   |             |                              |                 |                       |                                |       |
|                     | Total  | 193 |       |                |            |                                  |             |         |         |             |                              |                 |                       |                                |       |
| total weight (g)    | DWC-1  | 19  | 0.36  | 0.07           | 0.02       | 0.33                             | 0.39        | .16     | .49     | 0.648       | 0.02*                        | 0.05            | 0.02                  | 0.01                           | 0.10  |
|                     | DWC-2  | 20  | 0.31  | 0.07           | 0.01       | 0.28                             | 0.34        | .18     | .42     |             |                              |                 |                       |                                |       |
|                     | SC-1   | 17  | 0.42  | 0.17           | 0.04       | 0.33                             | 0.50        | .05     | .69     | 0.216       | <0.001*                      | 0.24            | 0.04                  | 0.14                           | 0.33  |
|                     | SC-2   | 21  | 0.18  | 0.11           | 0.02       | 0.13                             | 0.23        | .02     | .38     |             |                              |                 |                       |                                |       |
|                     | 62.5-1 | 16  | 0.27  | 0.14           | 0.03       | 0.20                             | 0.34        | .05     | .51     | 0.103       | 0.14                         | 0.06            | 0.04                  | -0.02                          | 0.15  |
|                     | 62.5-2 | 14  | 0.21  | 0.09           | 0.02       | 0.15                             | 0.26        | .08     | .36     |             |                              |                 |                       |                                |       |
|                     | 125-1  | 19  | 0.32  | 0.11           | 0.03       | 0.27                             | 0.37        | .09     | .46     | 0.242       | 0.001*                       | 0.13            | 0.03                  | 0.06                           | 0.20  |
|                     | 125-2  | 14  | 0.19  | 0.08           | 0.02       | 0.14                             | 0.24        | .06     | .34     |             |                              |                 |                       |                                |       |
|                     | 250-1  | 8   | 0.07  | 0.02           | 0.01       | 0.05                             | 0.09        | .04     | .10     | 0.044       | <0.001*#                     | -0.12           | 0.02                  | -0.17                          | -0.07 |
|                     | 250-2  | 17  | 0.19  | 0.09           | 0.02       | 0.14                             | 0.24        | .04     | .42     |             |                              |                 |                       |                                |       |
|                     | 500-1  | 18  | 0.21  | 0.12           | 0.03       | 0.15                             | 0.27        | .03     | .40     | 0.778       | 0.118                        | -0.07           | 0.05                  | -0.17                          | 0.02  |
|                     | 500-2  | 10  | 0.28  | 0.11           | 0.04       | 0.20                             | 0.36        | .12     | .47     |             |                              |                 |                       |                                |       |
|                     | Total  | 193 |       |                |            |                                  |             |         |         |             |                              |                 |                       |                                |       |

# significant variance found; Welch's t Test used (equal variance not assumed)

\* significant difference found between duplicate tanks of the same treatment

Table B

Descriptives per treatment MT experiment

|                     |       | N  | Mean  | Std. Deviation | Std. Error | Interval for Mean |             | Minimum | Maximum |
|---------------------|-------|----|-------|----------------|------------|-------------------|-------------|---------|---------|
|                     |       |    |       |                |            | Lower Bound       | Upper Bound |         |         |
| shell diameter (mm) | DWC   | 39 | 10.86 | 1.26           | .20        | 10.45             | 11.27       | 7.62    | 13.43   |
|                     | SC    | 38 | 9.36  | 3.02           | .49        | 8.37              | 10.36       | 3.57    | 15.03   |
|                     | 62.5  | 30 | 9.14  | 2.22           | .40        | 8.31              | 9.97        | 4.97    | 14.07   |
|                     | 125   | 33 | 9.84  | 2.06           | .36        | 9.11              | 10.57       | 5.30    | 13.48   |
|                     | 250   | 25 | 7.57  | 1.95           | .39        | 6.77              | 8.38        | 4.17    | 10.97   |
|                     | 500   | 28 | 8.93  | 2.65           | .50        | 7.90              | 9.96        | 2.97    | 13.51   |
|                     | Total |    | 193   |                |            |                   |             |         |         |
| total weight (g)    | DWC   | 39 | .33   | .07            | .01        | .31               | .35         | .16     | .49     |
|                     | SC    | 38 | .29   | .18            | .03        | .23               | .35         | .02     | .69     |
|                     | 62.5  | 30 | .24   | .12            | .02        | .20               | .28         | .05     | .51     |
|                     | 125   | 33 | .26   | .12            | .02        | .22               | .30         | .06     | .46     |
|                     | 250   | 25 | .15   | .10            | .02        | .11               | .19         | .04     | .42     |
|                     | 500   | 28 | .24   | .12            | .02        | .19               | .28         | .03     | .47     |
|                     | Total |    | 193   |                |            |                   |             |         |         |

Table C

shell diameter - MT

Tukey HSD

| tank   | N  | Subset for alpha = 0.05 |        |         |         |
|--------|----|-------------------------|--------|---------|---------|
|        |    | 1                       | 2      | 3       | 4       |
| 250-1  | 8  | 5.7888                  |        |         |         |
| SC-2   | 21 | 7.5910                  | 7.5910 |         |         |
| 500-1  | 18 |                         | 8.3239 | 8.3239  |         |
| 125-2  | 14 |                         | 8.4057 | 8.4057  |         |
| 250-2  | 17 |                         | 8.4100 | 8.4100  |         |
| 62.5-2 | 14 |                         | 8.5114 | 8.5114  |         |
| 62.5-1 | 16 |                         | 9.6906 | 9.6906  | 9.6906  |
| 500-2  | 10 |                         |        | 10.0200 | 10.0200 |
| DWC-2  | 20 |                         |        | 10.2325 | 10.2325 |
| 125-1  | 19 |                         |        |         | 10.8953 |
| DWC-1  | 19 |                         |        |         | 11.5174 |
| SC-1   | 17 |                         |        |         | 11.5512 |
|        |    | .320                    | .128   | .238    | .273    |

Means for groups in homogeneous subsets are displayed.

- a. Uses Harmonic Mean Sample Size = 14.880
- b. The group sizes are unequal. The harmonic mean of the group sizes is used. Type I error levels are not guaranteed

Table D

Total weight - MT

Tukey HSD

| tank1  | N  | Subset for alpha = 0.05 |        |        |       |        |
|--------|----|-------------------------|--------|--------|-------|--------|
|        |    | 1                       | 2      | 3      | 4     | 5      |
| 250-1  | 8  | .0729                   |        |        |       |        |
| SC-2   | 21 | .1829                   | .1829  |        |       |        |
| 125-2  | 14 | .1886                   | .1886  |        |       |        |
| 250-2  | 17 | .1902                   | .1902  |        |       |        |
| 62.5-2 | 14 |                         | .2051  | .2051  |       |        |
| 500-1  | 18 |                         | .2093  | .2093  |       |        |
| 62.5-1 | 16 |                         | .2701  | .2701  | .2701 |        |
| 500-2  | 10 |                         | .2823  | .2823  | .2823 |        |
| DWC-2  | 20 |                         | 0.3062 | .3062  | .3062 | 0.3062 |
| 125-1  | 19 |                         |        | 0.3183 | .3183 | 0.3183 |
| DWC-1  | 19 |                         |        |        | .3582 | 0.3582 |
| SC-1   | 17 |                         |        |        |       | 0.4186 |
|        |    | .107                    | .071   | .141   | .495  | 0.147  |

Means for groups in homogeneous subsets are displayed.

- a. Uses Harmonic Mean Sample Size = 12.271.
- b. The group sizes are unequal. The harmonic mean of the group sizes is used. Type I error levels are not guaranteed.

Table E

Descriptives per tank

normalised ovotestis weight

|        | N   | Mean | Std. Deviation | Std. Error | 95% Confidence Interval for Mean |             | Minimum | Maximum | Levene's P= | t-test for Equality of Means |                 |                       | 95% Confidence Interval of the Difference |        |
|--------|-----|------|----------------|------------|----------------------------------|-------------|---------|---------|-------------|------------------------------|-----------------|-----------------------|-------------------------------------------|--------|
|        |     |      |                |            | Lower Bound                      | Upper Bound |         |         |             | Sig. (2-tailed) P=           | Mean Difference | Std. Error Difference | Lower                                     | Upper  |
| DWC-1  | 17  | .024 | .007           | .002       | .020                             | .028        | .010    | .040    | 0.878       | 0.846                        | 0.001           | 0.003                 | -0.005                                    | 0.006  |
| DWC-2  | 17  | .023 | .008           | .002       | .019                             | .028        | .010    | .050    |             |                              |                 |                       |                                           |        |
| SC-1   | 13  | .020 | .006           | .002       | .016                             | .024        | .010    | .040    | 0.297       | 0.023*                       | 0.007           | 0.003                 | 0.001                                     | 0.013  |
| SC-2   | 10  | .013 | .008           | .002       | .007                             | .018        | .000    | .030    |             |                              |                 |                       |                                           |        |
| 62.5-1 | 12  | .022 | .012           | .004       | .014                             | .030        | .010    | .040    | 0.698       | 0.469                        | -0.004          | 0.005                 | -0.015                                    | 0.007  |
| 62.5-2 | 11  | .026 | .013           | .004       | .017                             | .034        | .010    | .050    |             |                              |                 |                       |                                           |        |
| 125-1  | 18  | .022 | .007           | .002       | .019                             | .025        | .010    | .040    | 0.732       | 0.603                        | -0.002          | 0.003                 | -0.008                                    | 0.005  |
| 125-2  | 8   | .024 | .008           | .003       | .017                             | .031        | .010    | .040    |             |                              |                 |                       |                                           |        |
| 250-1  | 0   |      |                |            |                                  |             |         |         |             |                              |                 |                       |                                           |        |
| 250-2  | 11  | .020 | .008           | .003       | .015                             | .026        | .010    | .030    |             |                              |                 |                       |                                           |        |
| 500-1  | 13  | .018 | .008           | .002       | .014                             | .023        | .010    | .030    | 0.518       | 0.026*                       | -0.010          | 0.004                 | -0.019                                    | -0.001 |
| 500-2  | 9   | .028 | .012           | .004       | .019                             | .038        | .020    | .060    |             |                              |                 |                       |                                           |        |
| Total  | 139 |      |                |            |                                  |             |         |         |             |                              |                 |                       |                                           |        |

# significant variance found; Welch's t Test used (equal variance not assumed)

\* significant difference found between duplicate tanks of the same treatment

Table F

Descriptives per treatment

normalised ovotestis weight

|       | N   | Mean  | Std. Deviation | Std. Error | Interval for Mean |             | Minimum | Maximum |
|-------|-----|-------|----------------|------------|-------------------|-------------|---------|---------|
|       |     |       |                |            | Lower Bound       | Upper Bound |         |         |
| DWC   | 34  | .0237 | .00764         | .00131     | .0210             | .0264       | .01     | .05     |
| SC    | 23  | .0167 | .00764         | .00159     | .0134             | .0200       | .00     | .04     |
| 62.5  | 23  | .0238 | .01236         | .00258     | .0184             | .0291       | .01     | .05     |
| 125   | 26  | .0226 | .00704         | .00138     | .0197             | .0254       | .01     | .04     |
| 250   | 11  | .0202 | .00844         | .00254     | .0146             | .0259       | .01     | .03     |
| 500   | 22  | .0222 | .01076         | .00229     | .0174             | .0270       | .01     | .06     |
| Total | 139 |       |                |            |                   |             |         |         |

Table G

ovo

Tukey HSD

| tank   | N  | Subset for alpha = 0.05 |       |
|--------|----|-------------------------|-------|
|        |    | 1                       | 2     |
| SC-2   | 10 | .0127                   |       |
| 500-1  | 13 | .0181                   | .0181 |
| SC-1   | 13 | .0198                   | .0198 |
| 250-2  | 11 | .0202                   | .0202 |
| 62.5-1 | 12 | .0219                   | .0219 |
| 125-1  | 18 | .0221                   | .0221 |
| DWC-2  | 17 | .0234                   | .0234 |
| 125-2  | 8  | .0237                   | .0237 |
| DWC-1  | 17 | .0240                   | .0240 |
| 62.5-2 | 11 |                         | .0258 |
| 500-2  | 9  |                         | .0282 |
| Sig.   |    | .084                    | .178  |

Means for groups in homogeneous subsets are

b. The group sizes are unequal.

The harmonic mean of the group sizes is used.

Type I error levels are not guaranteed.

Table H

**Descriptives per tank**

normalised albumen weight

|        | N   | Mean  | Std. Deviation | Std. Error | 95% Confidence Interval for Mean |             | Minimum | Maximum | Levene's P= | t-test for Equality of Means |                 |                       | 95% Confidence Interval of the Difference |          |
|--------|-----|-------|----------------|------------|----------------------------------|-------------|---------|---------|-------------|------------------------------|-----------------|-----------------------|-------------------------------------------|----------|
|        |     |       |                |            | Lower Bound                      | Upper Bound |         |         |             | Sig. (2-tailed) P=           | Mean Difference | Std. Error Difference | Lower                                     | Upper    |
| DWC-1  | 18  | .0232 | .00565         | .00133     | .0204                            | .0260       | .020    | .030    | 0.344       |                              |                 |                       |                                           |          |
| DWC-2  | 20  | .0258 | .00792         | .00177     | .0221                            | .0295       | .010    | .040    |             | 0.263                        | -0.00257        | 0.00226               | -0.00714                                  | 0.00201  |
| SC-1   | 11  | .0291 | .01079         | .00325     | .0218                            | .0363       | .020    | .050    | 0.362       |                              |                 |                       |                                           |          |
| SC-2   | 12  | .0250 | .01330         | .00384     | .0166                            | .0335       | .010    | .050    |             | 0.435                        | 0.00405         | 0.00508               | -0.00652                                  | 0.01461  |
| 62.5-1 | 11  | .0299 | .01738         | .00524     | .0182                            | .0415       | .000    | .060    | 0.312       |                              |                 |                       |                                           |          |
| 62.5-2 | 12  | .0443 | .01292         | .00373     | .0361                            | .0525       | .030    | .070    |             | 0.034*                       | -0.01444        | 0.00635               | -0.02764                                  | -0.00123 |
| 125-1  | 18  | .0260 | .00889         | .00210     | .0216                            | .0304       | .010    | .040    | 0.064       |                              |                 |                       |                                           |          |
| 125-2  | 9   | .0393 | .02364         | .00788     | .0212                            | .0575       | .010    | .090    |             | 0.042*                       | -0.01334        | 0.00623               | -0.02617                                  | -0.0052  |
| 250-1  | 2   | .0300 | 0.02373        | 0.01678    | -0.1832                          | 0.2432      | .010    | .050    | 0.44        |                              |                 |                       |                                           |          |
| 250-2  | 12  | .0258 | 0.01496        | 0.00432    | 0.0163                           | 0.0353      | .010    | .050    |             | 0.734                        | 0.004           | 0.012                 | -0.0222                                   | 0.03064  |
| 500-1  | 12  | .0233 | .01274         | .00368     | .0152                            | .0314       | .010    | .040    | 0.763       |                              |                 |                       |                                           |          |
| 500-2  | 9   | .0311 | .01119         | .00373     | .0225                            | .0397       | .020    | .050    |             | 0.159                        | -0.00782        | 0.00534               | -0.019                                    | 0.00336  |
| Total  | 146 |       |                |            |                                  |             |         |         |             |                              |                 |                       |                                           |          |

\* significant difference found between duplicate tanks of the same treatment

Table I

**Descriptives per treatment**

normalised albumen weight

|       | N   | Mean  | Std. Deviation | Std. Error | Interval for Mean |             | Minimum | Maximum |
|-------|-----|-------|----------------|------------|-------------------|-------------|---------|---------|
|       |     |       |                |            | Lower Bound       | Upper Bound |         |         |
| DWC   | 38  | .0246 | .00697         | .00113     | .0223             | .0269       | .010    | .040    |
| SC    | 23  | .0270 | .01207         | .00252     | .0217             | .0322       | .010    | .050    |
| 62.5  | 23  | .0374 | .01659         | .00346     | .0302             | .0446       | .000    | .070    |
| 125   | 27  | .0304 | .01627         | .00313     | .0240             | .0369       | .010    | .090    |
| 250   | 14  | .0264 | .01533         | .00410     | .0176             | .0353       | .010    | .050    |
| 500   | 21  | .0266 | .01246         | .00272     | .0210             | .0323       | .010    | .050    |
| Total | 146 |       |                |            |                   |             |         |         |

Table J

**albumen**

Tukey HSD

| tank   | N  | Subset for alpha = 0.05 |       |
|--------|----|-------------------------|-------|
|        |    | 1                       | 2     |
| DWC-1  | 18 | .0232                   |       |
| 500-1  | 12 | .0233                   |       |
| SC-2   | 12 | .0250                   | .0250 |
| DWC-1  | 20 | .0258                   | .0258 |
| 250-2  | 12 | .0258                   | .0258 |
| 125-1  | 18 | .0260                   | .0260 |
| SC-1   | 11 | .0291                   | .0291 |
| 62.5-1 | 11 | .0299                   | .0299 |
| 250-1  | 2  | .0300                   | .0300 |
| 500-2  | 9  | .0311                   | .0311 |
| 125-2  | 9  | .0393                   | .0393 |
| 62.5-2 | 12 |                         | .0443 |
| Sig.   |    | .266                    | .079  |

Means for groups in homogeneous subsets are  
a. Uses Harmonic Mean Sample Size = 8.581.  
b. The group sizes are unequal. The harmonic

Table K

Descriptives per tank

normalised gladular complex

|        | N  | Mean   | Std. Deviation | Std. Error | 95% Confidence Interval for Mean |             | Minimum | Maximum | Levene's P= | t-test for Equality of Means |                 |                       | 95% Confidence Interval of the Difference |         |
|--------|----|--------|----------------|------------|----------------------------------|-------------|---------|---------|-------------|------------------------------|-----------------|-----------------------|-------------------------------------------|---------|
|        |    |        |                |            | Lower Bound                      | Upper Bound |         |         |             | Sig. (2-tailed) P=           | Mean Difference | Std. Error Difference | Lower                                     | Upper   |
| DWC-1  | 12 | 0.2682 | 0.19495        | 0.05628    | 0.1443                           | 0.3921      | 0.17    | 0.87    | 0.034       | 0.433#                       | 0.04608         | 0.05665               | -0.07821                                  | 0.17038 |
| DWC-2  | 14 | 0.2221 | 0.02429        | 0.00649    | 0.2081                           | 0.2361      | 0.18    | 0.26    |             |                              |                 |                       |                                           |         |
| SC-1   | 7  | 0.1889 | 0.06688        | 0.02528    | 0.127                            | 0.2507      | 0.13    | 0.33    | 0.665       | 0.204                        | -0.05711        | 0.04166               | -0.15135                                  | 0.03713 |
| SC-2   | 4  | 0.246  | 0.06564        | 0.03282    | 0.1415                           | 0.3504      | 0.18    | 0.32    |             |                              |                 |                       |                                           |         |
| 62.5-1 | 9  | 0.2523 | 0.10898        | 0.03633    | 0.1686                           | 0.3361      | 0.15    | 0.53    | 0.981       | 0.145                        | -0.06861        | 0.04477               | -0.16352                                  | 0.02631 |
| 62.5-2 | 9  | 0.3209 | 0.07852        | 0.02617    | 0.2606                           | 0.3813      | 0.23    | 0.45    |             |                              |                 |                       |                                           |         |
| 125-1  | 12 | 0.1987 | 0.0318         | 0.00918    | 0.1785                           | 0.2189      | 0.14    | 0.25    | 0.074       | 0.177                        | -0.03283        | 0.02326               | -0.08214                                  | 0.01648 |
| 125-2  | 6  | 0.2315 | 0.06856        | 0.02799    | 0.1596                           | 0.3035      | 0.16    | 0.35    |             |                              |                 |                       |                                           |         |
| 250-1  | 0  |        |                |            |                                  |             |         |         |             |                              |                 |                       |                                           |         |
| 250-2  | 10 | 0.253  | 0.09922        | 0.03138    | 0.182                            | 0.3239      | 0.12    | 0.42    |             |                              |                 |                       |                                           |         |
| 500-1  | 6  | 0.1927 | 0.02854        | 0.01165    | 0.1628                           | 0.2227      | 0.15    | 0.23    | 0.98        | 0.383                        | -0.06924        | 0.07627               | -0.2371                                   | 0.09863 |
| 500-2  | 7  | 0.262  | 0.18378        | 0.06946    | 0.092                            | 0.4319      | 0.15    | 0.67    |             |                              |                 |                       |                                           |         |
| Total  | 96 |        |                |            |                                  |             |         |         |             |                              |                 |                       |                                           |         |

# significant variance found; Welch's t Test used (equal variance not assumed)

Table L

normalised gland complex

|       | N  | Mean  | Std. Deviation | Std. Error | Interval for Mean |             | Minimum | Maximum |
|-------|----|-------|----------------|------------|-------------------|-------------|---------|---------|
|       |    |       |                |            | Lower Bound       | Upper Bound |         |         |
| DWC   | 26 | .2434 | .13258         | .02600     | .1898             | .2969       | .170    | .870    |
| SC    | 11 | .2096 | .06933         | .02090     | .1630             | .2562       | .130    | .330    |
| 62.5  | 18 | .2866 | .09867         | .02326     | .2376             | .3357       | .150    | .530    |
| 125   | 18 | .2096 | .04786         | .01128     | .1858             | .2334       | .140    | .350    |
| 250   | 10 | .2530 | .09922         | .03138     | .1820             | .3239       | .120    | .420    |
| 500   | 13 | .2300 | .13608         | .03774     | .1478             | .3122       | .150    | .670    |
| Total | 96 |       |                |            |                   |             |         |         |

Levene Statistic P= 0.666

Table N

ANOVA

| GC             | Sum of Squares | df | Mean Square | F     | Sig. |
|----------------|----------------|----|-------------|-------|------|
| Between Groups | .069           | 5  | .014        | 1.241 | .297 |
| Within Groups  | 1.003          | 90 | .011        |       |      |
| Total          | 1.072          | 95 |             |       |      |

Table M

GC

Tukey HSD

| tank   | N  | Subset for alpha = 0.05 |
|--------|----|-------------------------|
|        |    | 1                       |
| SC-1   | 7  | .1889                   |
| 500-1  | 6  | .1927                   |
| 125-1  | 12 | .1987                   |
| DWC-2  | 14 | .2221                   |
| 125-2  | 6  | .2315                   |
| SC-2   | 4  | .2460                   |
| 62.5-1 | 9  | .2523                   |
| 250-2  | 10 | .2530                   |
| 500-2  | 7  | .2620                   |
| DWC-1  | 12 | .2682                   |
| 62.5-2 | 9  | .3209                   |
| Sig.   |    | .340                    |

Means for groups in homogeneous subsets. Uses Harmonic Mean Sample Size. The group sizes are unequal. The
