# Supplementary material for: Steroid Androgen Exposure during Development Has No Effect on Reproductive Physiology of Biomphalaria glabrata
Source: PubMed Central journal article supplement (PMC4957768; doi:10.1371/journal.pone.0159852), 2016-07-22
Supplement: pone.0159852.s011.pdf [file pone.0159852.s011.pdf]

Table A

Descriptives per tank DHT experiment

|                     |        | N   | Mean  | Std. Deviation | Std. Error | 95% Confidence Interval for Mean |             | Minimum | Maximum | Levene's P= | t-test for Equality of Means |                 |                       | 95% Confidence Interval of the |       |
|---------------------|--------|-----|-------|----------------|------------|----------------------------------|-------------|---------|---------|-------------|------------------------------|-----------------|-----------------------|--------------------------------|-------|
|                     |        |     |       |                |            | Lower Bound                      | Upper Bound |         |         |             | Sig. (2-tailed) P=           | Mean Difference | Std. Error Difference | Lower                          | Upper |
| shell diameter (mm) | DWC-1  | 15  | 11.65 | 1.62           | 0.42       | 10.76                            | 12.55       | 8.27    | 14.39   | 0.616       | 0.126                        | -0.96           | 0.60                  | -2.20                          | 0.29  |
|                     | DWC-2  | 10  | 12.61 | 1.22           | 0.39       | 11.74                            | 13.48       | 10.55   | 14.13   |             |                              |                 |                       |                                |       |
|                     | SC-1   | 20  | 11.26 | 1.17           | 0.26       | 10.71                            | 11.80       | 7.61    | 12.84   | 0.482       | 0.314                        | 0.40            | 0.39                  | -0.40                          | 1.20  |
|                     | SC-2   | 19  | 10.86 | 1.29           | 0.30       | 10.24                            | 11.48       | 8.14    | 12.97   |             |                              |                 |                       |                                |       |
|                     | 62.5-1 | 19  | 9.84  | 1.32           | 0.30       | 9.21                             | 10.48       | 6.78    | 11.47   | 0.422       | 0.009*                       | -1.09           | 0.40                  | -1.89                          | -0.28 |
|                     | 62.5-2 | 19  | 10.93 | 1.11           | 0.25       | 10.40                            | 11.46       | 7.70    | 12.77   |             |                              |                 |                       |                                |       |
|                     | 125-1  | 15  | 12.52 | 1.57           | 0.41       | 11.65                            | 13.39       | 9.41    | 15.17   | 0.806       | 0.271                        | -0.60           | 0.53                  | -1.69                          | 0.49  |
|                     | 125-2  | 16  | 13.12 | 1.41           | 0.35       | 12.37                            | 13.87       | 11.09   | 15.76   |             |                              |                 |                       |                                |       |
|                     | 250-1  | 1   | 12.73 |                |            |                                  |             | 12.73   | 12.73   |             |                              |                 |                       |                                |       |
|                     | 250-2  | 1   | 12.76 |                |            |                                  |             | 12.76   | 12.76   |             |                              |                 |                       |                                |       |
|                     | 500-1  | 6   | 11.99 | 2.34           | 0.96       | 9.53                             | 14.45       | 7.54    | 13.99   | 0.144       | 0.914                        | 0.11            | 0.96                  | -2.01                          | 2.22  |
|                     | 500-2  | 7   | 11.88 | 0.95           | 0.36       | 11.00                            | 12.76       | 10.33   | 13.10   |             |                              |                 |                       |                                |       |
|                     | Total  | 148 |       |                |            |                                  |             |         |         |             |                              |                 |                       |                                |       |
| total weight (g)    | DWC-1  | 15  | 0.36  | 0.12           | 0.03       | 0.29                             | 0.42        | .18     | .60     | 0.473       | 0.169                        | -0.07           | 0.05                  | -0.16                          | 0.03  |
|                     | DWC-2  | 10  | 0.42  | 0.10           | 0.03       | 0.35                             | 0.49        | .26     | .57     |             |                              |                 |                       |                                |       |
|                     | SC-1   | 20  | 0.37  | 0.08           | 0.02       | 0.33                             | 0.41        | .13     | .53     | 0.346       | 0.287                        | 0.03            | 0.03                  | -0.03                          | 0.09  |
|                     | SC-2   | 19  | 0.33  | 0.10           | 0.02       | 0.29                             | 0.38        | .13     | .52     |             |                              |                 |                       |                                |       |
|                     | 62.5-1 | 19  | 0.27  | 0.06           | 0.01       | 0.24                             | 0.30        | .11     | .40     | 0.605       | 0.013*                       | -0.06           | 0.02                  | -0.10                          | -0.01 |
|                     | 62.5-2 | 19  | 0.33  | 0.07           | 0.02       | 0.29                             | 0.36        | .14     | .47     |             |                              |                 |                       |                                |       |
|                     | 125-1  | 15  | 0.46  | 0.13           | 0.03       | 0.39                             | 0.54        | .25     | .67     | 0.475       | 0.667                        | -0.02           | 0.05                  | -0.11                          | 0.07  |
|                     | 125-2  | 16  | 0.48  | 0.12           | 0.03       | 0.42                             | 0.54        | .33     | .70     |             |                              |                 |                       |                                |       |
|                     | 250-1  | 1   | 0.49  |                |            |                                  |             | .49     | .49     |             |                              |                 |                       |                                |       |
|                     | 250-2  | 1   | 0.47  |                |            |                                  |             | .47     | .47     |             |                              |                 |                       |                                |       |
|                     | 500-1  | 6   | 0.44  | 0.16           | 0.06       | 0.28                             | 0.61        | .15     | .60     | 0.238       | 0.651                        | 0.03            | 0.07                  | -0.11                          | 0.17  |
|                     | 500-2  | 7   | 0.41  | 0.07           | 0.03       | 0.35                             | 0.48        | .30     | .50     |             |                              |                 |                       |                                |       |
|                     | Total  | 148 |       |                |            |                                  |             |         |         |             |                              |                 |                       |                                |       |

\* significant difference found between duplicate tanks of the same treatment

Table B

Descriptives per treatment DHT experiment

|                     |       | N   | Mean  | Std. Deviation | Std. Error | Interval for Mean |             | Minimum | Maximum |
|---------------------|-------|-----|-------|----------------|------------|-------------------|-------------|---------|---------|
|                     |       |     |       |                |            | Lower Bound       | Upper Bound |         |         |
| shell diameter (mm) | DWC   | 25  | 12.04 | 1.52           | .30        | 11.41             | 12.66       | 8.27    | 14.39   |
|                     | SC    | 39  | 11.06 | 1.23           | .20        | 10.66             | 11.46       | 7.61    | 12.97   |
|                     | 62.5  | 38  | 10.39 | 1.32           | .21        | 9.95              | 10.82       | 6.78    | 12.77   |
|                     | 125   | 31  | 12.83 | 1.49           | .27        | 12.28             | 13.37       | 9.41    | 15.76   |
|                     | 250   | 2   | 12.75 | 0.02           | .01        | 12.55             | 12.94       | 12.73   | 12.76   |
|                     | 500   | 13  | 11.93 | 1.66           | .46        | 10.93             | 12.93       | 7.54    | 13.99   |
|                     | Total | 148 |       |                |            |                   |             |         |         |
| total weight (g)    | DWC   | 25  | .38   | .12            | .02        | .33               | .43         | .18     | .60     |
|                     | SC    | 39  | .35   | .09            | .01        | .32               | .38         | .13     | .53     |
|                     | 62.5  | 38  | .30   | .07            | .01        | .28               | .32         | .11     | .47     |
|                     | 125   | 31  | .47   | .12            | .02        | .43               | .52         | .25     | .70     |
|                     | 250   | 2   | .48   | .01            | .01        | .35               | .61         | .47     | .49     |
|                     | 500   | 13  | .43   | .11            | .03        | .36               | .50         | .15     | .60     |
|                     | Total | 148 |       |                |            |                   |             |         |         |

Table C

shell diameter - DHT

Tukey HSD

| tank1  | N  | Subset for alpha = 0.05 |         |         |
|--------|----|-------------------------|---------|---------|
|        |    | 1                       | 2       | 3       |
| 62.5-1 | 19 | 9.8437                  |         |         |
| SC-2   | 19 | 10.8563                 | 10.8563 |         |
| 62.5-2 | 19 | 10.9300                 | 10.9300 |         |
| SC-1   | 20 | 11.2575                 | 11.2575 |         |
| DWC-1  | 15 |                         | 11.6533 | 11.6533 |
| 500-2  | 7  |                         | 11.8800 | 11.8800 |
| 500-1  | 6  |                         | 11.9867 | 11.9867 |
| 125-1  | 15 |                         | 12.5167 | 12.5167 |
| DWC-2  | 10 |                         | 12.6090 | 12.6090 |
| 125-2  | 16 |                         |         | 13.1169 |
| Sig.   |    | .251                    | .058    | .208    |

Means for groups in homogeneous subsets are displayed.

- a. Uses Harmonic Mean Sample Size = 12.296.
- b. The group sizes are unequal. The harmonic mean of the group sizes is used. Type I error levels are not garenteed

Table D

Total weight - DHT

Tukey HSD

| tank1  | N  | Subset for alpha = 0.05 |       |       |       |
|--------|----|-------------------------|-------|-------|-------|
|        |    | 1                       | 2     | 3     | 4     |
| 62.5-1 | 19 | .2718                   |       |       |       |
| 62.5-2 | 19 | .3289                   | .3289 |       |       |
| SC-2   | 19 | .3346                   | .3346 | .3346 |       |
| DWC-1  | 15 | .3561                   | .3561 | .3561 | .3561 |
| SC-1   | 20 | .3668                   | .3668 | .3668 | .3668 |
| 500-2  | 7  |                         | .4141 | .4141 | .4141 |
| DWC-2  | 10 |                         | .4225 | .4225 | .4225 |
| 500-1  | 6  |                         | .4445 | .4445 | .4445 |
| 125-1  | 15 |                         |       | .4625 | .4625 |
| 125-2  | 16 |                         |       |       | .4821 |
| Sig.   |    | .377                    | .136  | .063  | .071  |

Means for groups in homogeneous subsets are displayed.

- a. Uses Harmonic Mean Sample Size = 12.271.
- b. The group sizes are unequal. The harmonic mean of the group sizes is used. Type I error levels are not guaranteed.

Table E

Descriptives per tank

normalised ovotestis weight

|        | N   | Mean | Std. Deviation | Std. Error | 95% Confidence Interval for Mean |             | Minimum | Maximum | Levene's P= | t-test for Equality of Means |                 |                       | 95% Confidence Interval of the Difference |       |
|--------|-----|------|----------------|------------|----------------------------------|-------------|---------|---------|-------------|------------------------------|-----------------|-----------------------|-------------------------------------------|-------|
|        |     |      |                |            | Lower Bound                      | Upper Bound |         |         |             | Sig. (2-tailed) P=           | Mean Difference | Std. Error Difference | Lower                                     | Upper |
|        |     |      |                |            |                                  |             |         |         |             |                              |                 |                       |                                           |       |
| DWC-1  | 8   | .022 | .007           | .002       | .016                             | .028        | .016    | .038    | 0.452       | 0.372                        | -0.004          | 0.004                 | -0.013                                    | 0.005 |
| DWC-2  | 9   | .026 | .010           | .003       | .018                             | .034        | .016    | .049    |             |                              |                 |                       |                                           |       |
| SC-1   | 14  | .022 | .011           | .003       | .016                             | .029        | .010    | .050    | 0.487       | 0.855                        | 0.001           | 0.004                 | -0.008                                    | 0.010 |
| SC-2   | 9   | .021 | .008           | .003       | .016                             | .027        | .010    | .040    |             |                              |                 |                       |                                           |       |
| 62.5-1 | 15  | .021 | .005           | .001       | .018                             | .024        | .011    | .027    | 0.051       | 0.963                        | 0.000           | 0.003                 | -0.005                                    | 0.005 |
| 62.5-2 | 15  | .021 | .008           | .002       | .016                             | .026        | .009    | .036    |             |                              |                 |                       |                                           |       |
| 125-1  | 12  | .019 | .006           | .002       | .015                             | .023        | .008    | .029    | 0.576       | 0.362                        | -0.002          | 0.002                 | -0.006                                    | 0.002 |
| 125-2  | 16  | .021 | .005           | .001       | .018                             | .023        | .013    | .030    |             |                              |                 |                       |                                           |       |
| 250-1  | 1   | .003 |                |            |                                  |             | .003    | .003    |             |                              |                 |                       |                                           |       |
| 250-2  | 1   | .022 |                |            |                                  |             | .022    | .022    |             |                              |                 |                       |                                           |       |
| 500-1  | 5   | .019 | .004           | .002       | .014                             | .024        | .013    | .024    | 0.037#      | 0.414                        | 0.002           | 0.002                 | -0.003                                    | 0.007 |
| 500-2  | 7   | .017 | .002           | .001       | .015                             | .019        | .013    | .019    |             |                              |                 |                       |                                           |       |
| Total  | 112 |      |                |            |                                  |             |         |         |             |                              |                 |                       |                                           |       |

# significant variance found; Welch's t Test used (equal variance not assumed)

Descriptives per treatment

normalised ovotestis weight

|       | N   | Mean  | Std. Deviation | Std. Error | Interval for Mean |             | Minimum | Maximum |
|-------|-----|-------|----------------|------------|-------------------|-------------|---------|---------|
|       |     |       |                |            | Lower Bound       | Upper Bound |         |         |
| DWC   | 17  | .0242 | .00858         | .00208     | .0198             | .0286       | .02     | .05     |
| SC    | 23  | .0218 | .00986         | .00206     | .0176             | .0261       | .01     | .05     |
| 62.5  | 30  | .0211 | .00680         | .00124     | .0186             | .0236       | .01     | .04     |
| 125   | 28  | .0200 | .00542         | .00102     | .0179             | .0221       | .01     | .03     |
| 250   | 2   | .0122 | .01323         | .00936     | -.1067            | .1311       | .00     | .02     |
| 500   | 12  | .0177 | .00308         | .00089     | .0158             | .0197       | .01     | .02     |
| Total | 112 |       |                |            |                   |             |         |         |

Levene Statistic

P= 0.055

Table G

ANOVA

normalised ovotestis weight

|                | Sum of Squares | df  | Mean Square | F     | Sig. |
|----------------|----------------|-----|-------------|-------|------|
| Between Groups | .000           | 5   | .000        | 1.841 | .111 |
| Within Groups  | .006           | 106 | .000        |       |      |
| Total          | .006           | 111 |             |       |      |

Table F

Table H

Descriptives per tank

normalised albumen weight

|        | N   | Mean  | Std. Deviation | Std. Error | 95% Confidence Interval for Mean |             | Minimum | Maximum | Levene's P= | t-test for Equality of Means |                 |                       | 95% Confidence Interval of the Difference |         |
|--------|-----|-------|----------------|------------|----------------------------------|-------------|---------|---------|-------------|------------------------------|-----------------|-----------------------|-------------------------------------------|---------|
|        |     |       |                |            | Lower Bound                      | Upper Bound |         |         |             | Sig. (2-tailed) P=           | Mean Difference | Std. Error Difference | Lower                                     | Upper   |
| DWC-1  | 15  | .0199 | .00697         | .00180     | .0160                            | .0237       | .010    | .030    | 0.359       | 0.891                        | -0.00036        | 0.00263               | -0.00582                                  | 0.00509 |
| DWC-2  | 10  | .0202 | .00556         | .00176     | .0162                            | .0242       | .010    | .030    |             |                              |                 |                       |                                           |         |
| SC-1   | 19  | .0303 | .01180         | .00271     | .0246                            | .0360       | .000    | .050    | 0.323       | 0.748                        | -0.00119        | 0.00367               | -0.00866                                  | 0.00628 |
| SC-2   | 16  | .0315 | .00951         | .00238     | .0264                            | .0366       | .010    | .050    |             |                              |                 |                       |                                           |         |
| 62.5-1 | 18  | .0263 | .00757         | .00178     | .0225                            | .0300       | .020    | .040    | 0.471       | 0.124                        | -0.00471        | 0.00299               | -0.01079                                  | 0.00136 |
| 62.5-2 | 18  | .0310 | .01017         | .00240     | .0259                            | .0360       | .020    | .060    |             |                              |                 |                       |                                           |         |
| 125-1  | 15  | .0226 | .00663         | .00171     | .0189                            | .0263       | .010    | .030    | 0.099       | 0.124                        | -0.00471        | 0.00299               | -0.01079                                  | 0.00136 |
| 125-2  | 16  | .0328 | .03595         | .00899     | .0137                            | .0520       | .020    | .160    |             |                              |                 |                       |                                           |         |
| 250-1  | 1   | .0260 | .              | .          | .                                | .           | .030    | .030    |             |                              |                 |                       |                                           |         |
| 250-2  | 1   | .0466 | .              | .          | .                                | .           | .050    | .050    |             |                              |                 |                       |                                           |         |
| 500-1  | 6   | .0244 | .00686         | .00280     | .0172                            | .0316       | .020    | .030    | 0.320       | 0.523                        | 0.00229         | 0.00347               | -0.00535                                  | 0.00994 |
| 500-2  | 7   | .0221 | .00568         | .00215     | .0168                            | .0273       | .020    | .030    |             |                              |                 |                       |                                           |         |
| Total  | 142 |       |                |            |                                  |             |         |         |             |                              |                 |                       |                                           |         |

Table I

Descriptives per treatment

normalised albumen weight

|       | N   | Mean  | Std. Deviation | Std. Error | Interval for Mean |             | Minimum | Maximum |
|-------|-----|-------|----------------|------------|-------------------|-------------|---------|---------|
|       |     |       |                |            | Lower Bound       | Upper Bound |         |         |
| DWC   | 25  | .0200 | .00632         | .00126     | .0174             | .0226       | .007    | .034    |
| SC    | 35  | .0309 | .01068         | .00180     | .0272             | .0345       | .003    | .053    |
| 62.5  | 36  | .0286 | .00915         | .00153     | .0255             | .0317       | .016    | .056    |
| 125   | 31  | .0279 | .02634         | .00473     | .0182             | .0375       | .012    | .164    |
| 250   | 2   | .0363 | .01454         | .01028     | -.0943            | .1669       | .026    | .047    |
| 500   | 13  | .0232 | .00610         | .00169     | .0195             | .0268       | .017    | .035    |
| Total | 142 |       |                |            |                   |             |         |         |

Levene Statistic

P= 0.290

Table J

ANOVA

|                | Sum of Squares | df  | Mean Square | F     | Sig. |
|----------------|----------------|-----|-------------|-------|------|
| Between Groups | .002           | 5   | .000        | 2.074 | .072 |
| Within Groups  | .029           | 136 | .000        |       |      |
| Total          | .031           | 141 |             |       |      |

Table K

Descriptives per tank

normalised gladular complex

|        | N  | Mean  | Std. Deviation | Std. Error | 95% Confidence Interval for Mean |             | Minimum | Maximum | Levene's P= | t-test for Equality of Means |                 |                       | 95% Confidence Interval of the Difference |         |
|--------|----|-------|----------------|------------|----------------------------------|-------------|---------|---------|-------------|------------------------------|-----------------|-----------------------|-------------------------------------------|---------|
|        |    |       |                |            | Lower Bound                      | Upper Bound |         |         |             | Sig. (2-tailed) P=           | Mean Difference | Std. Error Difference | Lower                                     | Upper   |
| DWC-1  | 9  | .2543 | .09642         | .03214     | .1802                            | .3284       | .15     | .45     | 0.024#      | 0.064                        | 0.06993         | 0.0331                | -0.00499                                  | 0.14485 |
| DWC-2  | 9  | .1843 | .02378         | .00793     | .1661                            | .2026       | .14     | .21     |             |                              |                 |                       |                                           |         |
| SC-1   | 13 | .1810 | .07450         | .02066     | .1359                            | .2260       | .05     | .30     | 0.246       | 0.085                        | -0.04724        | 0.02628               | -0.1016                                   | 0.00713 |
| SC-2   | 12 | .2282 | .05438         | .01570     | .1936                            | .2627       | .16     | .36     |             |                              |                 |                       |                                           |         |
| 62.5-1 | 14 | .2360 | .04619         | .01235     | .2094                            | .2627       | .19     | .32     | 0.595       | 0.704                        | 0.00843         | 0.0219                | -0.037                                    | 0.05386 |
| 62.5-2 | 10 | .2276 | .06131         | .01939     | .1837                            | .2715       | .16     | .36     |             |                              |                 |                       |                                           |         |
| 125-1  | 9  | .1895 | .06408         | .02136     | .1402                            | .2387       | .11     | .30     | 0.577       | 0.905                        | -0.00524        | 0.04273               | -0.09929                                  | 0.08881 |
| 125-2  | 4  | .1947 | .08712         | .04356     | .0561                            | .3333       | .11     | .31     |             |                              |                 |                       |                                           |         |
| 250-1  | 0  |       |                |            |                                  |             |         |         |             |                              |                 |                       |                                           |         |
| 250-2  | 0  |       |                |            |                                  |             |         |         |             |                              |                 |                       |                                           |         |
| 500-1  | 5  | .2033 | .03663         | .01638     | .1578                            | .2487       | .14     | .23     | 0.595       | 0.38                         | -0.02911        | 0.03074               | -0.10433                                  | 0.04612 |
| 500-2  | 3  | .2324 | .05131         | .02962     | .1049                            | .3598       | .18     | .28     |             |                              |                 |                       |                                           |         |
| Total  | 88 |       |                |            |                                  |             |         |         |             |                              |                 |                       |                                           |         |

# significant variance found; Welch's t Test used (equal variance not assumed)

Table L

Descriptives per treatment

normalised glandular complex

|        | N  | Mean  | Std. Deviation | Std. Error | Interval for Mean |             | Minimum | Maximum |
|--------|----|-------|----------------|------------|-------------------|-------------|---------|---------|
|        |    |       |                |            | Lower Bound       | Upper Bound |         |         |
| DWC    | 18 | .2193 | .07704         | .01816     | .1810             | .2576       | .14     | .45     |
| SC     | 25 | .2036 | .06863         | .01373     | .1753             | .2320       | .05     | .36     |
| 62.5ng | 24 | .2325 | .05191         | .01060     | .2106             | .2544       | .16     | .36     |
| 125ng  | 13 | .1911 | .06813         | .01890     | .1499             | .2323       | .11     | .31     |
| 500ng  | 8  | .2142 | .04178         | .01477     | .1792             | .2491       | .14     | .28     |
| Total  | 88 |       |                |            |                   |             |         |         |

Levene Statistic

P= 0.636

Table M

ANOVA

normalised gladular complex

|                | Sum of Squares | df | Mean Square | F     | Sig. |
|----------------|----------------|----|-------------|-------|------|
| Between Groups | .018           | 4  | .005        | 1.101 | .362 |
| Within Groups  | .344           | 83 | .004        |       |      |
| Total          | .362           | 87 |             |       |      |
